# Supplementary material
Source: MDPI journal article supplement (https://www.mdpi.com/2077-0472/11/5/380)
Supplement: s1 [file s1]

# Supplementary Materials:

**Table S1.** Mean weed coverage and standard deviation (sd) of the treatments before herbicide application 2017–2018. In each year, we did not analyse significant differences ( $p < 0.05$ ) in weed coverage between the treatments. Kruskal-Wallis Test.

| Treatment     | Mean weed coverage (%) (sd) |             |              |
|---------------|-----------------------------|-------------|--------------|
|               | 2017                        | 2018        | 2019         |
| Control       | 7.85 (1.86)                 | 1.98 (1.06) | 13.25 (3.55) |
| CHEM-POST     | 6.75 (2.80)                 | 2.21 (1.28) | 14.25 (5.54) |
| MECH-C        | 7.10 (1.86)                 | 2.48 (1.56) | 13.19 (5.13) |
| CHEM-PRE      | 8.15 (2.74)                 | 2.13 (0.98) | 16.06 (5.32) |
| CHEM-PRE/POST | 7.82 (1.99)                 | 2.28 (1.12) | 12.75 (4.77) |

**Table S2.** Mean dry matter content (%) and standard deviation (sd) of the treatments.

| Treatment     | Mean weed coverage (%) (sd) |      |      |
|---------------|-----------------------------|------|------|
|               | 2017                        | 2018 | 2019 |
| Control       | 32.9                        | 31.4 | 25.9 |
| CHEM-POST     | 32.7                        | 32.3 | 26.1 |
| MECH-C        | 28.8                        | 30.5 | 25.9 |
| CHEM-PRE      | 33.8                        | 33.6 | 25.6 |
| CHEM-PRE/POST | 33.1                        | 33.5 | 26.3 |
